# Supplementary material for: Genome-Wide Analysis Revealed Homozygosity and Demographic History of Five Chinese Sheep Breeds Adapted to Different Environments
Source: MDPI journal article supplement (doi:10.3390/genes11121480), 2020-12-09
Supplement: s1 [file s1]

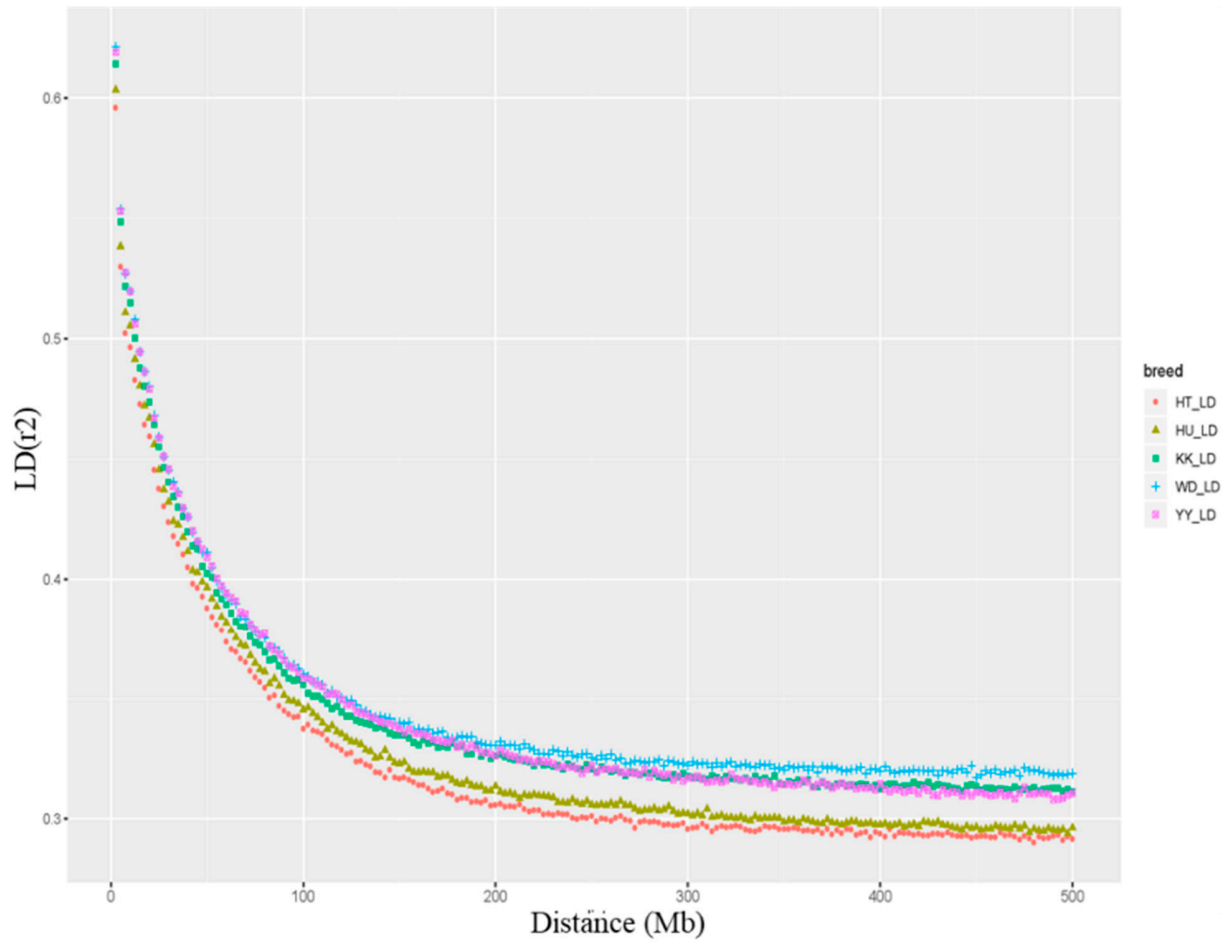

**Figure S2.** Linkage disequilibrium (LD) decay by distance across the five Chinese sheep breeds, Hetian (HT), Hu (HU), Karakul (KK), Wadi (WD) and Yabuyi (YY).
