# Supplementary material for: Genome-Wide Analysis Revealed Homozygosity and Demographic History of Five Chinese Sheep Breeds Adapted to Different Environments
Source: Genes (Basel). 2020 Dec 9;11(12):1480. doi: 10.3390/genes11121480 (PMC7764688; doi:10.3390/genes11121480)
Supplement: Supplementary file 1 [file genes-11-01480-s001.zip]

Archive with 4 entries (4 files):
- Figuer S1.pdf
- Figuer S2.pdf
- Table S1.xlsx
- Table S2.xlsx
