# Supplementary material for: Genome-Wide Analysis Revealed Homozygosity and Demographic History of Five Chinese Sheep Breeds Adapted to Different Environments
Source: Genes (Basel). 2020 Dec 9;11(12):1480. doi: 10.3390/genes11121480 (PMC7764688; doi:10.3390/genes11121480)
Supplement: Supplementary file 1 [file genes-11-01480-s001.zip › Table S1.xlsx]

## Sheet: Sheet1
Table S2: Autozygosity islands were evident across the genome
Chromosome	Gene start (bp)	Gene end (bp)	Gene stable ID	Gene name	Gene description
1	245372427	245466240	ENSOARG00000006643	RASA2	RAS p21 protein activator 2
1	109863404	109883685	ENSOARG00000008861	SLAMF6	SLAM family member 6
1	109915742	109941231	ENSOARG00000008878	CD84	CD84 molecule
1	183234435	183316995	ENSOARG00000019854	GPR156	G protein-coupled receptor 156
1	183373956	183394622	ENSOARG00000019879	LRRC58	leucine rich repeat containing 58
1	184567855	184619155	ENSOARG00000020078	EAF2	ELL associated factor 2
1	183343776	183343825	ENSOARG00000023911	5S_rRNA	5S ribosomal RNA
11	18306789	18308204	ENSOARG00000003991	EVI2B	ecotropic viral integration site 2B
11	18317151	18318473	ENSOARG00000004008	OMG	oligodendrocyte myelin glycoprotein
11	18245395	18441418	ENSOARG00000014671	NF1	neurofibromin 1
12	32069057	32165641	ENSOARG00000006697	CEP170	centrosomal protein 170
13	51640703	51674356	ENSOARG00000005226	VPS16	VPS16 core subunit of CORVET and HOPS complexes
13	63388680	63446846	ENSOARG00000009759	ITCH	itchy E3 ubiquitin protein ligase
13	63462217	63470918	ENSOARG00000009982	DYNLRB1	dynein light chain roadblock-type 1
13	63487401	63488149	ENSOARG00000009989	MAP1LC3A	microtubule associated protein 1 light chain 3 alpha
13	63488367	63582164	ENSOARG00000010095	PIGU	phosphatidylinositol glycan anchor biosynthesis class U
20	50065679	50397477	ENSOARG00000002773	GMDS	GDP-mannose 4,6-dehydratase
4	101365854	101490099	ENSOARG00000009957	CREB3L2	cAMP responsive element binding protein 3 like 2
4	101544228	101598085	ENSOARG00000010045	AKR1D1	aldo-keto reductase family 1 member D1
5	7579941	7664534	ENSOARG00000003640	BRD4	bromodomain containing 4
5	7669684	7673094	ENSOARG00000003767	EPHX3	epoxide hydrolase 3
6	36566367	36630153	ENSOARG00000002335	PKD2	polycystin 2, transient receptor potential cation channel
6	36651734	36658288	ENSOARG00000002590	SPP1	secreted phosphoprotein 1
6	29361947	29448079	ENSOARG00000017161	BMPR1B	bone morphogenetic protein receptor type 1B
7	89258424	89431877	ENSOARG00000002882	TSHR	thyroid stimulating hormone receptor
7	89482053	89517062	ENSOARG00000002918	GTF2A1	general transcription factor IIA subunit 1
7	40391715	40504372	ENSOARG00000020647	MAP4K5	mitogen-activated protein kinase kinase kinase kinase 5
7	40504870	40594891	ENSOARG00000020652	ATL1	atlastin GTPase 1
7	40594745	40621621	ENSOARG00000020654	SAV1	salvador family WW domain containing protein 1
7	57145756	57436036	ENSOARG00000020996	ATP8B4	ATPase phospholipid transporting 8B4 (putative)
