# Supplementary material for: Genome-Wide Analysis Revealed Homozygosity and Demographic History of Five Chinese Sheep Breeds Adapted to Different Environments
Source: Genes (Basel). 2020 Dec 9;11(12):1480. doi: 10.3390/genes11121480 (PMC7764688; doi:10.3390/genes11121480)
Supplement: Supplementary file 1 [file genes-11-01480-s001.zip › Table S2.xlsx]

## Sheet: Sheet1
Table S3 . Genomic Regions with a High ROH Frequency
Category	Term	Count	%	PValue	Genes	List Total	Pop Hits	Pop Total	Fold Enrichment	Bonferroni	Benjamini	FDR
GOTERM_CC_DIRECT	GO:0005922~connexon complex	3	0.0805802	0.000204994	GJB6, GJA3, GJB2	20	15	13162	131.62	0.00674267	0.00674267	0.178788
GOTERM_MF_DIRECT	GO:0004190~aspartic-type endopeptidase activity	3	0.0805802	0.00211207	PAG10, PAG9, PAG4	15	52	10488	40.3385	0.0373423	0.0373423	1.54642
KEGG_PATHWAY	oas04974:Protein digestion and absorption	3	0.0805802	0.00541213	PAG10, PAG9, PAG4	8	128	7729	22.6436	0.0424857	0.0424857	2.92725
GOTERM_MF_DIRECT	GO:0005243~gap junction channel activity	2	0.0537201	0.00665777	GJA3, GJB2	15	5	10488	279.68	0.113293	0.0583487	4.80474
GOTERM_BP_DIRECT	GO:0015693~magnesium ion transport	2	0.0537201	0.0153786	NIPA2, NIPA1	16	11	10659	121.125	0.427607	0.427607	12.9103
GOTERM_MF_DIRECT	GO:0015095~magnesium ion transmembrane transporter activity	2	0.0537201	0.0172246	NIPA2, NIPA1	15	13	10488	107.569	0.268563	0.0989984	12.0211
GOTERM_BP_DIRECT	GO:0007154~cell communication	2	0.0537201	0.0222956	GJB6, GJA3	16	16	10659	83.2734	0.555909	0.333598	18.2179
GOTERM_CC_DIRECT	GO:0005730~nucleolus	4	0.10744	0.0308954	CRYL1, PSPC1, IMP4, MPHOSPH8	20	484	13162	5.43884	0.644998	0.404179	23.9611
GOTERM_BP_DIRECT	GO:0007286~spermatid development	2	0.0537201	0.0568229	RNF17, OCA2	16	49	10659	27.1913	0.917071	0.563918	46.0364
