# Supplementary figures and images for: Genome-Wide Analysis Revealed Homozygosity and Demographic History of Five Chinese Sheep Breeds Adapted to Different Environments
Source: MDPI journal article supplement (doi:10.3390/genes11121480), 2020-12-09

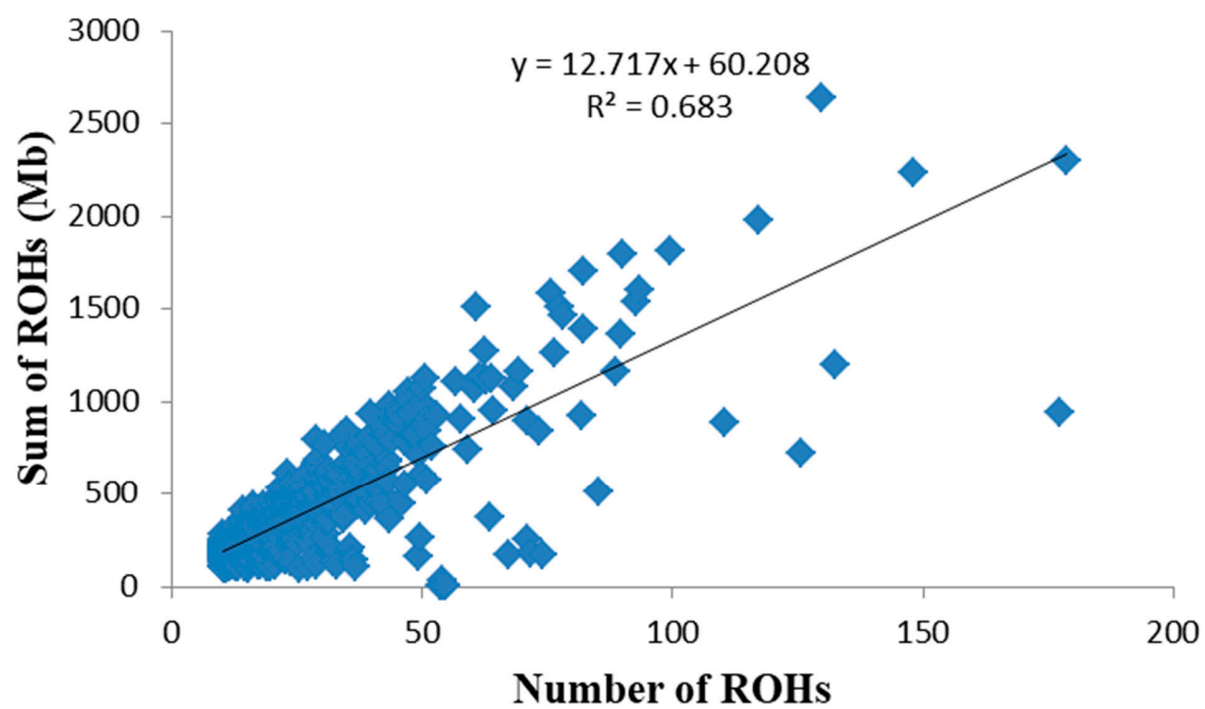

**Figure S1:** A correlation between the numbers of ROHs (n ROH) and the sum of all ROH segments.

Supplement: s1 [file s1]
